# Supplementary material
Source: ML conference proceedings conference paper supplement (https://proceedings.neurips.cc/paper_files/paper/2019/hash/cff34ad343b069ea6920464ad17d4bcf-Abstract.html)
Supplement: Supplementary file 1 [file cff34ad343b069ea6920464ad17d4bcf-Supplemental.zip]

Archive with 1 entries (1 files):
- Encoding Database Schemas with Relation-Aware Self-Attention for Text-to-SQL Parsers.pdf
